# Supplementary material
Source: PubMed Central journal article supplement (PMC7549430)
Supplement: NIHMS1631913-supplement-1.pdf [file NIHMS1631913-supplement-1.pdf]

**Cell Reports, Volume 32**

## **Supplemental Information**

### **Replication Stress Induces Global Chromosome**

### **Breakage in the Fragile X Genome**

**Arijita Chakraborty, Piroon Jenjaroenpun, Jing Li, Sami El Hilali, Andrew McCulley, Brian Haarer, Elizabeth A. Hoffman, Aimee Belak, Audrey Thorland, Heidi Hehnly, Carl Schildkraut, Chun-long Chen, Vladimir A. Kuznetsov, and Wenyi Feng**

## Supplemental Figure S1

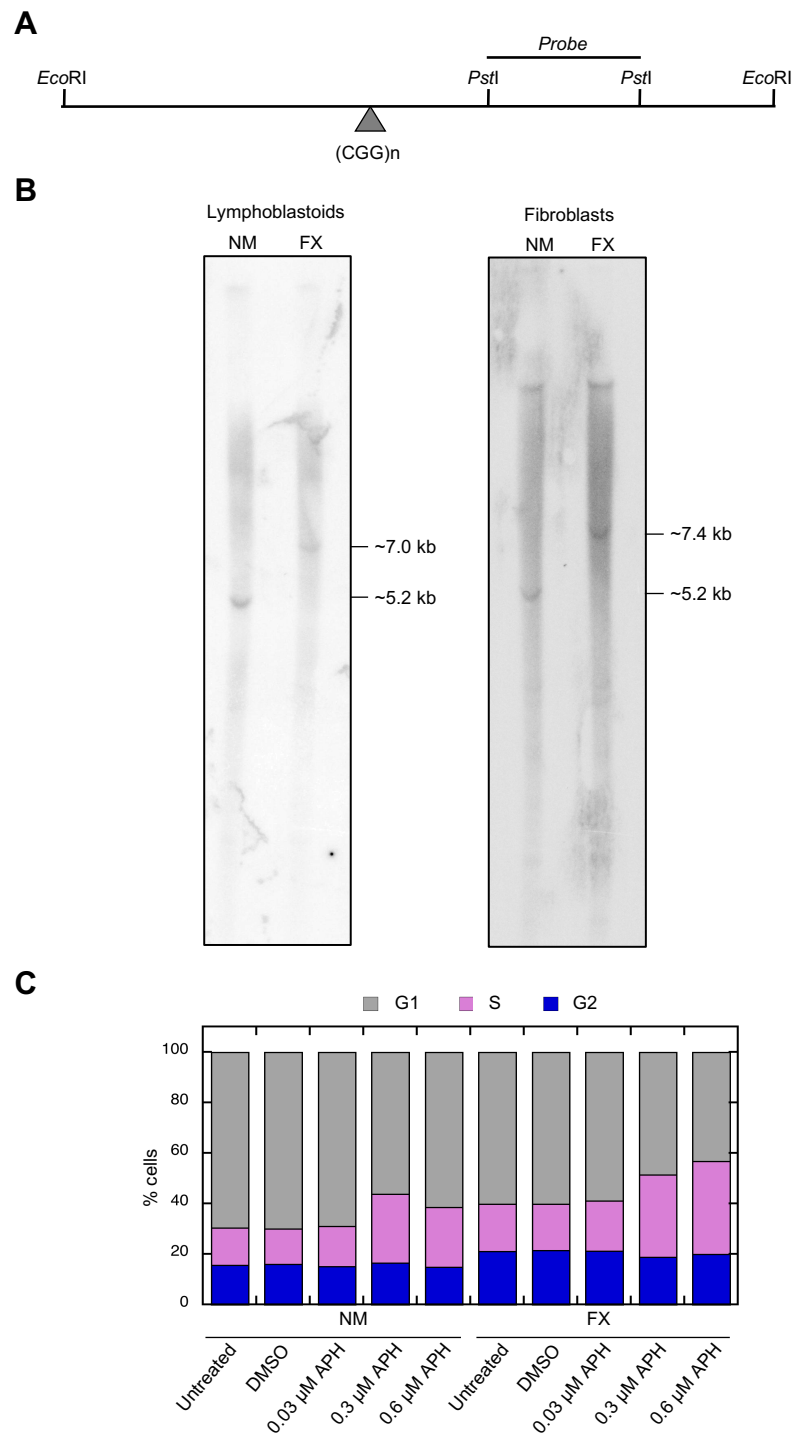

**Figure S1. Related to Figure 1A. Validation of CGG repeat expansion at *FMR1* locus and the absence of FMRP expression in the Fragile X cell lines used in this study. (A)** The restriction map of the 5.2 kb *EcoRI* fragment in the *FMR1* locus and probe position used for Southern blots are shown. The probe was synthesized by PCR amplification from genomic DNA isolated from GM06990 using the following primers: FMR1-F, 5'-TGGCTTCTCTTTTCCGGTCT-3'; FMR1-R, 5'-GGTTACCTTTTGCCTCCTT-3'. **(B)** Southern blots of *EcoRI*-digested genomic DNA from the indicated cell lines. A band corresponding to 5.2 kb (containing 30-50 CGG repeats) was seen in the normal cell lines. In contrast, two bands corresponding to ~7.0 kb and ~7.4 kb were identified in the FX lymphoblastoid and fibroblast lines, which correspond to ~590 and 730 CGG repeat expansion, respectively. **(C)** Cell cycle distribution analyzed by flow cytometry. Three independent experiments were conducted, and one representative experiment is shown.

## Supplemental Figure S2

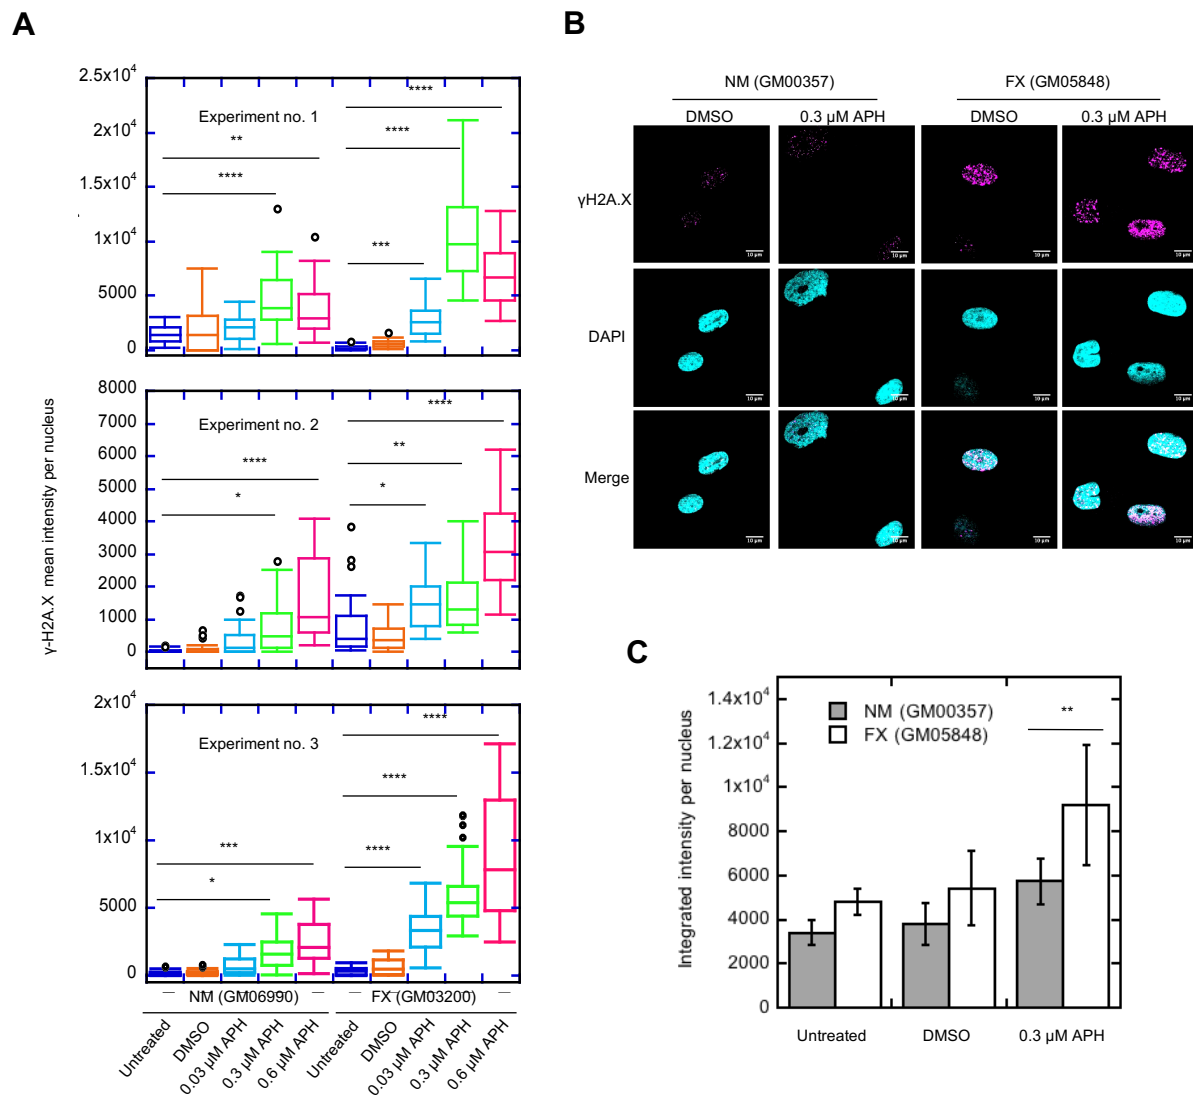

**Figure S2. Related to Figure 1B. Lymphoblastoid cells and fibroblasts from FX have increased DNA damage. (A)** Box plots for  $\gamma$ -H2A.X immunofluorescence staining of lymphoblastoid cells under the indicated conditions from **Figure 1B**. Plotted are mean intensity values of fluorescence per nucleus in three independent experiments ( $n \geq 28$  nuclei counted for each experiment). One-way ANOVA test followed by Tukey's multiple comparison test were performed. **(B&C)** Fibroblast cell line from a FX individual shows increased DNA damage compared to a sex and age matched control fibroblast cell line. Two independent experiments were performed, and one representative experiment is shown here. At least 41 nuclei per sample were analyzed in each experiment. Representative images for  $\gamma$ H2A.X staining in FX and NM cells under the indicated treatment (B) and quantification of  $\gamma$ H2A.X signals per nucleus (C) are shown. Error bars indicate standard deviation. Two-way ANOVA test followed by Sidak's multiple testing was performed. \* $p < 0.05$ , \*\* $p < 0.01$ , \*\*\* $p < 0.001$  and \*\*\*\* $p < 0.0001$ . Scale bar, 10  $\mu$ m.

## Supplemental Figure S3

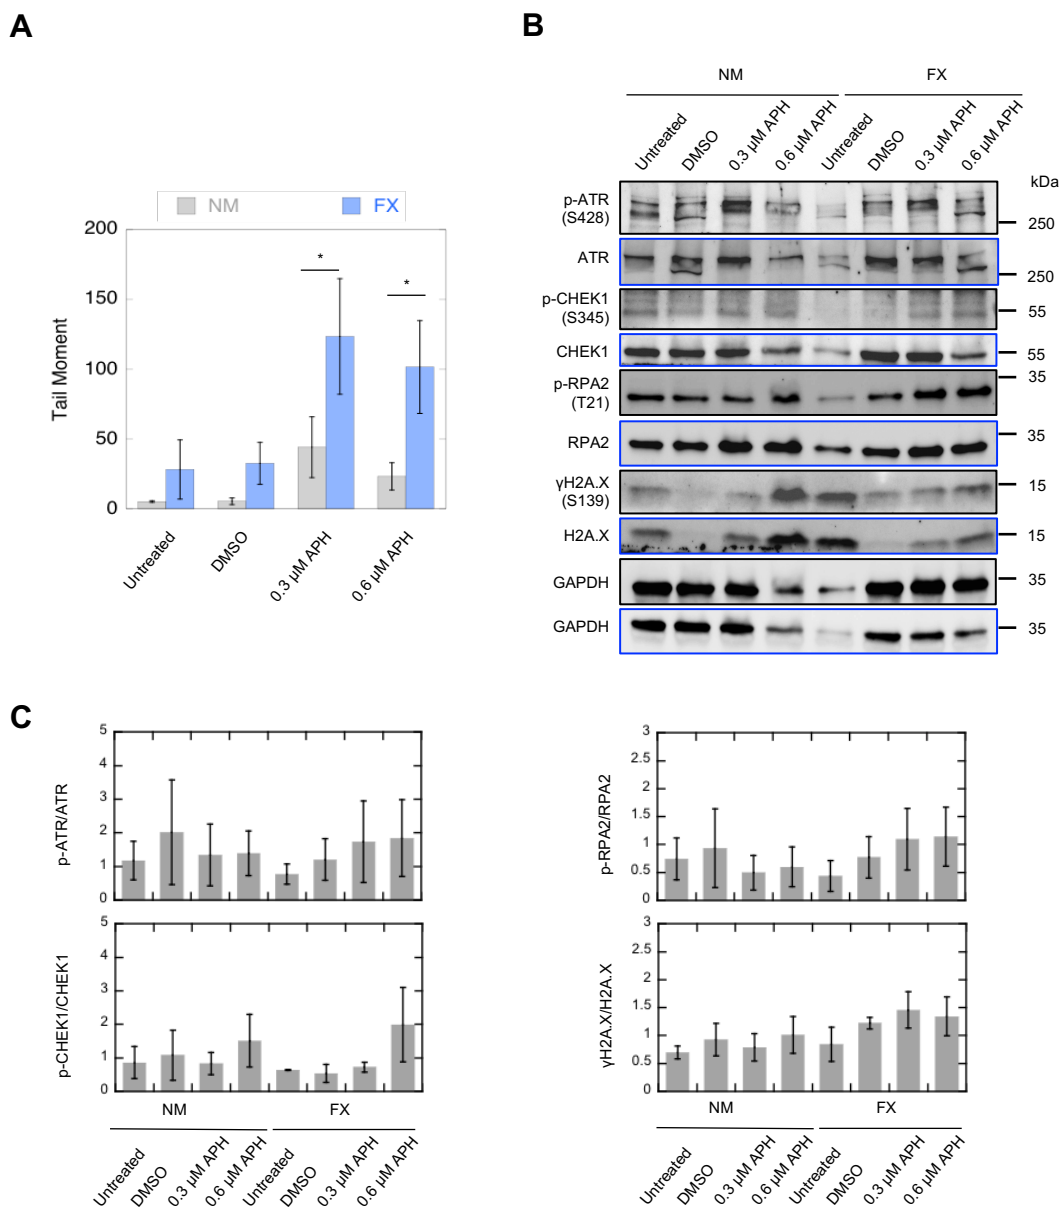

**Figure S3. Related to Figures 1E&F. DNA damage is elevated and DDR is not impaired in FX cells. (A)** DSB formation measured by neutral Comet assay. Three independent experiments were performed ( $n > 50$  in each) and all trended similarly. A representative experiment is shown for Tail Moment measurement. One-way ANOVA followed by Sidak's multiple testing was performed. Error bars denote standard errors of mean and  $*p < 0.05$ . **(B)** Whole cell lysates from NM and FX lymphoblastoid cells western blotted for proteins in the DDR pathway. Blots probed with antibodies against phospho(p)-proteins and total proteins are shown in black and blue bordered panels, respectively. Both sets of blots were controlled for loading using GAPDH. **(C)** Quantification of phosphorylation of DDR proteins in (A). Error bars indicate standard error of mean.

## Supplemental Figure S4

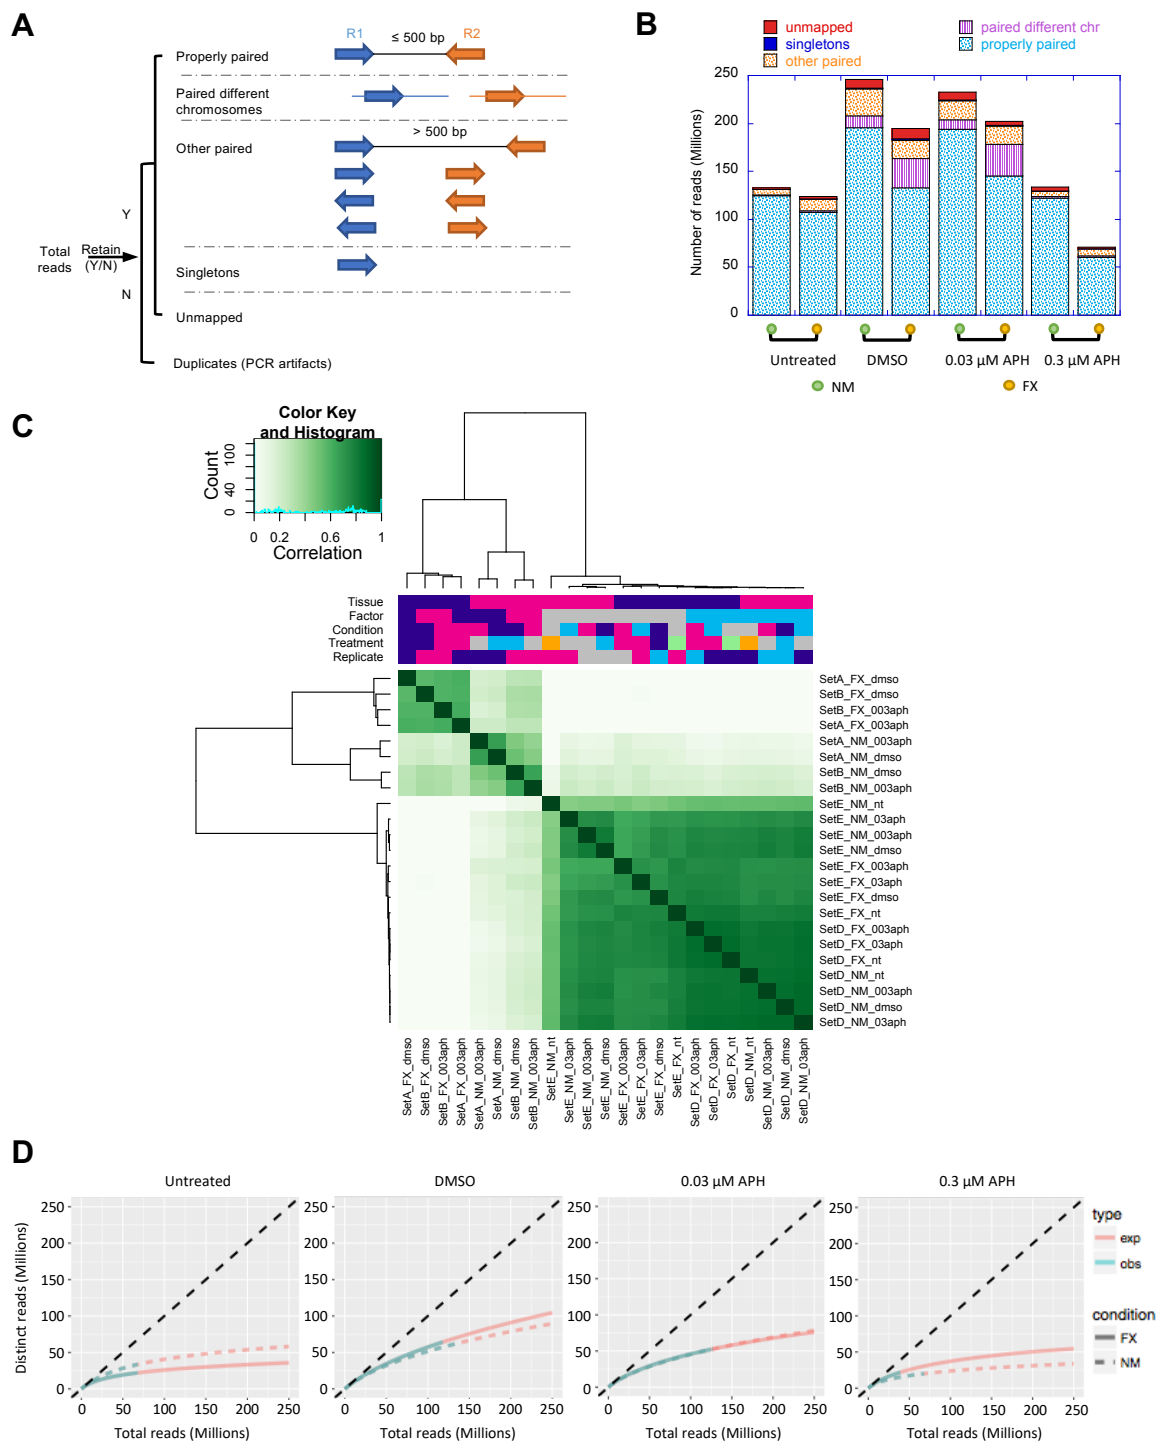

**Figure S4. Related to Figure 3. Break-seq data quality check. (A&B)** Break-seq library quality assessed by read classifications. “R1” and “R2”, Read 1 and Read 2, respectively. Samples with the same treatment were merged to assess overall sequencing depth in (B). **(C)** Break-seq experiments correlation heatmap generated by plot (FX.breakseq) in DiffBind. Note that FX\_dmsmo has three instead of four replicates due to the removal of a dubious experiment (SetD\_FX\_dmsmo). **(D)** Break-seq library complexity of FX and NM cells (“obs” and “exp” stand for observed and expected library complexities, respectively). Libraries from biological replicates for each treatment condition were merged for complexity measure.

## Supplemental Figure S5

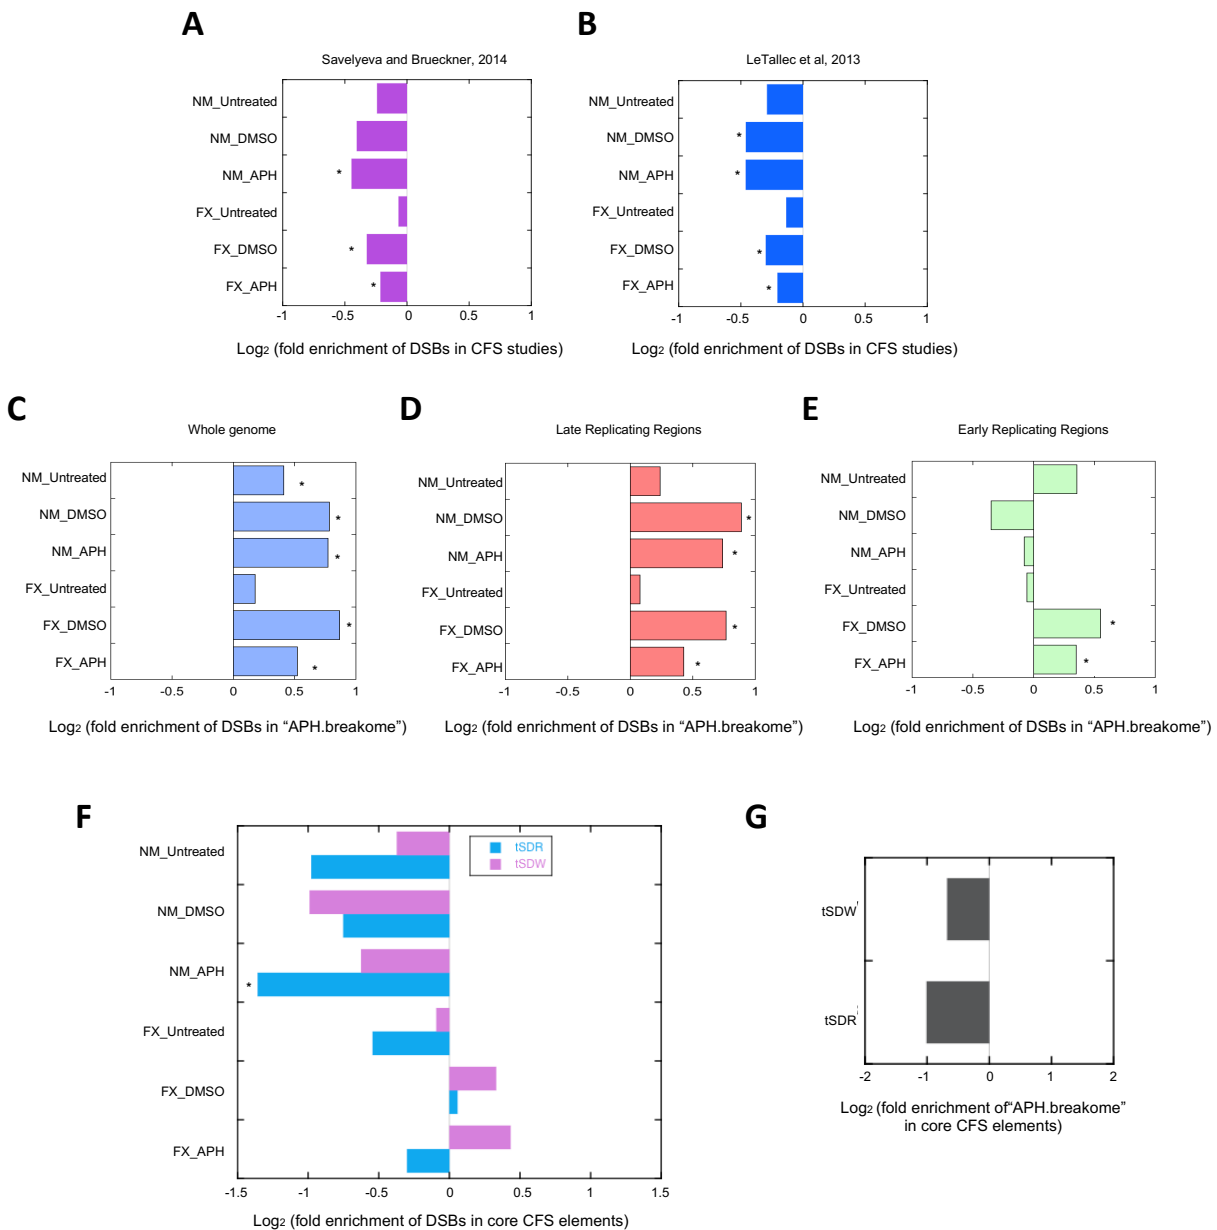

**Figure S5. Related to Figure 4D. Genomic Association Test (GAT) for correlations between DSBs in our study and CFSs reported in literature.** (A-B) Correlation between DSBs and reported CFSs. Log<sub>2</sub> transformation of the fold enrichment values (ratios of observed to expected number of DSBs) are reported for CFSs mapped by Savelyeva and Brueckner, 2014 (A) and LeTallec et al, 2013 (B). Correlation between those DSBs that are concordant with the "APH.breakome" in the whole genome (C), the late replicating regions (D), and the early replicating regions (E). (F) Correlation between DSBs and the late-replicating CFS core elements containing large transcribed genes, defined as tSDWs (transcribed Significantly Delayed Windows) and tSDRs (transcribed Significantly Delayed Regions), in Brison et al. 2019. (G) Correlation between "APH.breakome" and the late-replicating CFS core elements containing large transcribed genes as in (F). Those samples marked with an asterisk indicate p values  $\leq 0.001$ .

## Supplemental Figure S6

**A**

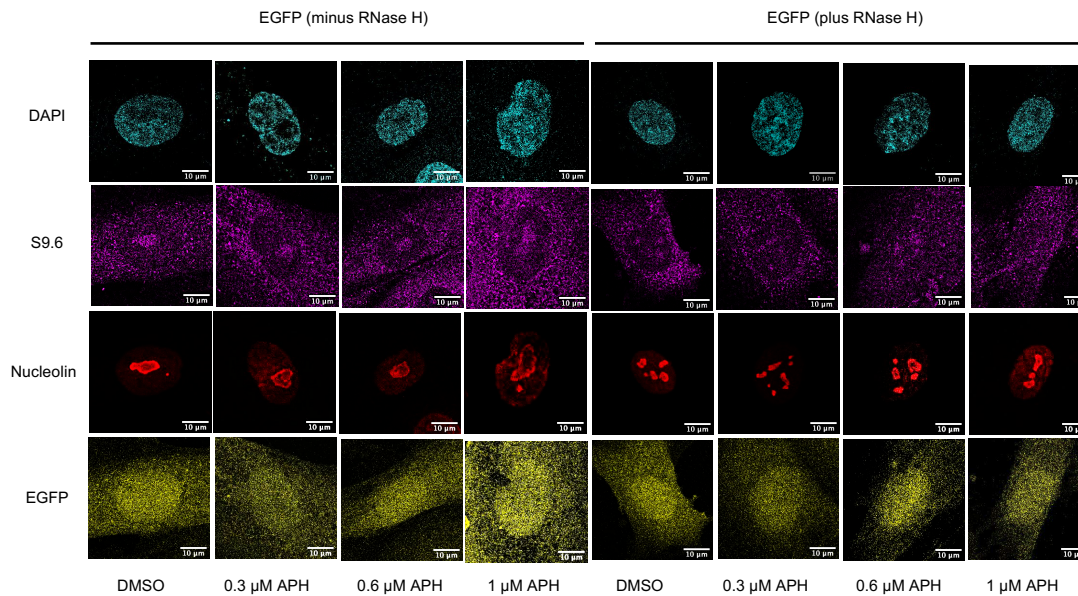

**B**

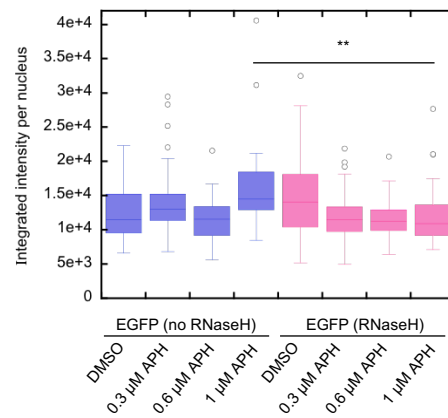

**Figure S6. Related to Figure 5. Nuclear RNA:DNA hybrid signals detected by S9.6 antibody is labile to RNase H treatment. (A)** Representative confocal images of immunofluorescence staining with S9.6 antibody in FX cells expression EGFP untreated or treated with RNaseH prior to staining. Scale bar, 10  $\mu$ m. **(B)** Quantification of nuclear S9.6 signals in three independent experiments ( $n \geq 36$  in each) using one-way ANOVA with multiple comparisons where  $**p < 0.01$ .

## Supplemental Figure S7

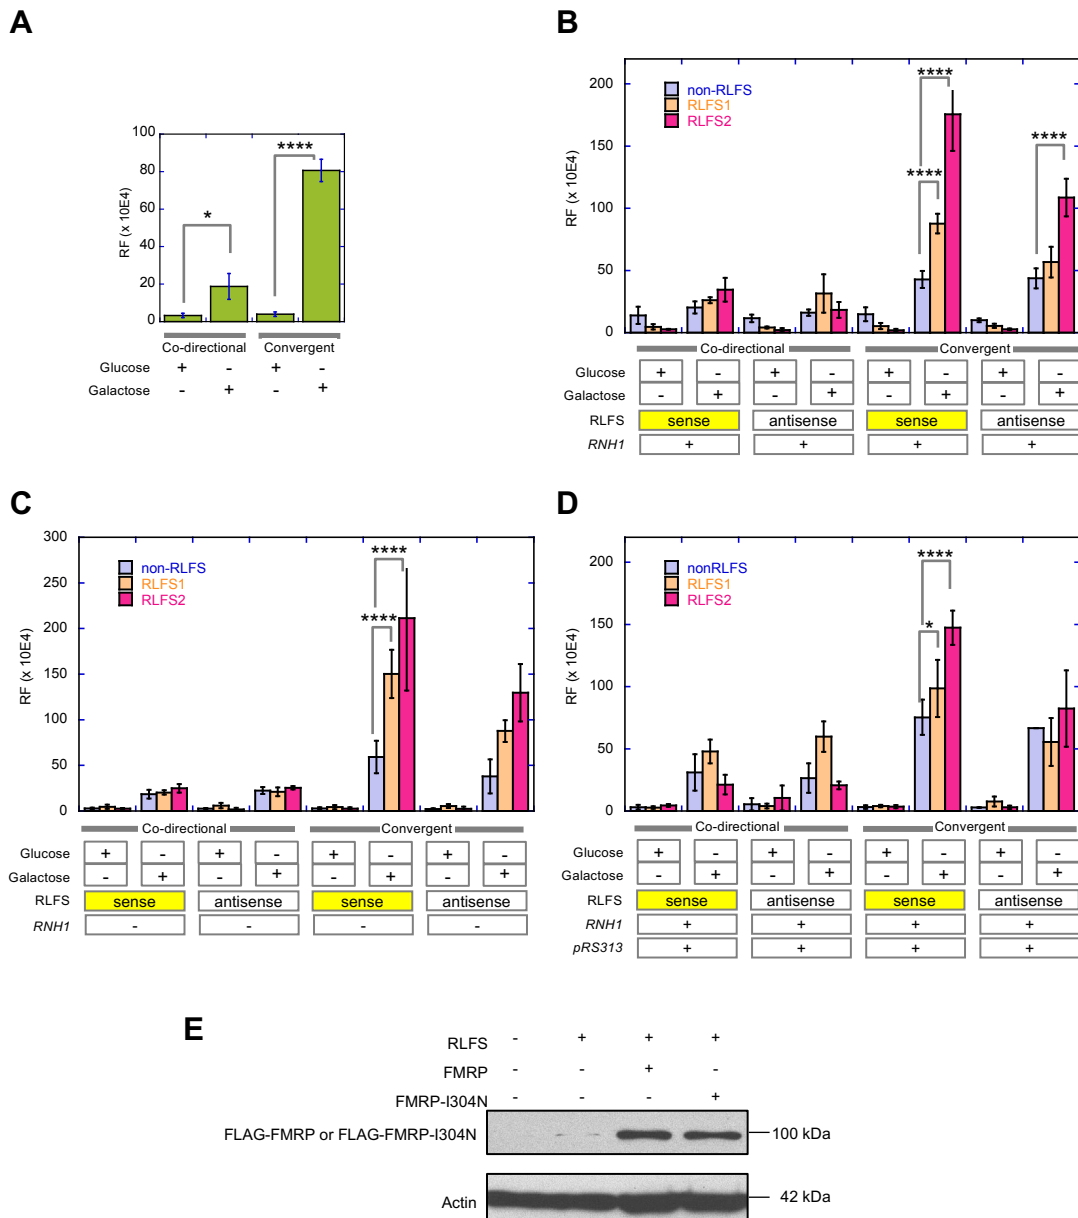

**Figure S7. Related to Figure 6. Control experiments for RLFS-induced DNA breakage and recombination frequency (RF) in yeast.** (A) RF is dependent on transcriptional activation. One-way ANOVA followed by Tukey's multiple testing was performed. (B) Insertions of RLFS elements from the human genome can further induce RF, specifically when inserted in the "sense" orientation with respect to transcription. (C) The RLFS-induced RF can be further enhanced by deletion of *rnh1*, the gene encoding for RNase H1. Note the change of scale on the Y-axis in (C). (D) Cells bearing a second plasmid, pRS313, which appeared to have little effect on RF, serve as control for the experiments in Fig. 3B. From (A) to (D) \* $p < 0.05$  and \*\*\*\* $p < 0.0001$ . (E) FMRP and FMRP-I304N show similar expression levels in yeast. Cells transformed with a plasmid with or without an RLFS in the LEU2 gene cassette, together with a plasmid with or without the CMV-driven and FLAG-tagged FMR1 or FMR1-I304N, were analyzed by Western blot using the anti-FLAG antibody. Actin served as a loading control.



## SUPPLEMENTAL TABLES

**Table S1. Related to figure 4C.** Number of consensus DSB peaks (detected in at least 2 replicates) in all categories defined by strain/treatment/comparison combinations.

| <b>DSB category<sup>1</sup></b> | <b>Number of consensus DSBs</b> |
|---------------------------------|---------------------------------|
| FX.APH                          | 18473                           |
| FX.APH003                       | 16796                           |
| FX.APH03                        | 2112                            |
| FX.DMSO                         | 9167                            |
| FX.NT                           | 4149                            |
| FXdms0.FXaph.overlap            | 6177                            |
| FXdms0.FXaph.uniquetoFXaph      | 12296                           |
| FXdms0.FXaph.uniquetoFXdms0     | 2984                            |
| FXdms0.FXnt.overlap             | 322                             |
| FXdms0.FXnt.uniquetoFXdms0      | 8845                            |
| FXdms0.FXnt.uniquetoFXnt        | 3827                            |
| NM.APH                          | 7002                            |
| NM.APH003                       | 3506                            |
| NM.APH03                        | 2161                            |
| NM.DMSO                         | 3927                            |
| NM.NT                           | 2111                            |
| NMdmso.NMaph.overlap            | 3209                            |
| NMdmso.NMaph.uniquetoNMaph      | 3792                            |
| NMdmso.NMaph.uniquetoNMdmso     | 714                             |
| NMdmso.NMnt.overlap             | 1651                            |
| NMdmso.NMnt.uniquetoNMdmso      | 2276                            |
| NMdmso.NMnt.uniquetoNMnt        | 458                             |
| FXdms0.NMdmso.overlap           | 644                             |
| FXdms0.NMdmso.uniquetoFXdms0    | 8523                            |
| FXdms0.NMdmso.uniquetoNMdmso    | 3283                            |
| FXnt.NMnt.overlap               | 1753                            |
| FXnt.NMnt.uniquetoFXnt          | 2396                            |
| FXnt.NMnt.uniquetoNMnt          | 358                             |
| FXaph.NMaph.overlap             | 4369                            |
| FXaph.NMaph.uniquetoFXaph       | 14104                           |
| FXaph.NMaph.uniquetoNMaph       | 2633                            |

<sup>1</sup>Strain=FX, NM; Treatment=NT (untreated), DMSO, APH003 (0.03  $\mu$ M APH), APH03 (0.3  $\mu$ M APH), APH (composite of APH003 and APH03); Comparison=overlap (shared by two samples), uniquetoXXXX (unique to the sample indicated).

**Table S2. Related to figure 5G-H.** Select top Gene Ontology terms ( $p < 0.001$ ) for “Biological pathways” associated with DSBs in the indicated groups.

| <b>DSB Group</b>     | <b>Biological pathway</b>                   | <b>P value</b> | <b># of genes</b> |
|----------------------|---------------------------------------------|----------------|-------------------|
| FX_UNTREATED         | neuron projection development               | 1.12E-05       | 100               |
|                      | nervous system development                  | 2.08E-05       | 214               |
|                      | regulation of cell morphogenesis            | 2.08E-05       | 66                |
|                      | synapse organization                        | 5.29E-05       | 40                |
|                      | regulation of neuron projection development | 6.25E-05       | 58                |
|                      | neuron development                          | 8.09E-05       | 109               |
|                      | neuron cell-cell adhesion                   | 0.00015        | 9                 |
|                      | neuron projection morphogenesis             | 0.00018        | 70                |
|                      | ion transmembrane transport                 | 0.00025        | 107               |
|                      | inorganic ion transmembrane transport       | 0.00048        | 85                |
| FX_DMSO              | cell projection organization                | 0.00030        | 187               |
|                      | localization                                | 0.00030        | 717               |
|                      | cell part morphogenesis                     | 0.00050        | 131               |
|                      | inorganic ion transmembrane transport       | 0.00052        | 118               |
|                      | neuron development                          | 0.00075        | 146               |
|                      | cell projection morphogenesis               | 0.00086        | 126               |
| FX_APH               | positive regulation of GTPase activity      | 6.76E-06       | 180               |
|                      | regulation of cell morphogenesis            | 7.35E-06       | 139               |
|                      | nervous system development                  | 1.15E-05       | 504               |
|                      | regulation of cell projection organization  | 4.09E-05       | 152               |
|                      | neuron projection development               | 5.56E-05       | 213               |
|                      | regulation of neuron projection development | 9.09E-05       | 119               |
|                      | cell adhesion                               | 0.000107       | 405               |
|                      | chemical synaptic transmission              | 0.000107       | 163               |
|                      | movement of cell or subcellular component   | 0.000199       | 415               |
|                      | cell projection assembly                    | 0.000212       | 113               |
|                      | vesicle-mediated transport                  | 0.000347       | 343               |
|                      | synaptic vesicle localization               | 0.000569       | 46                |
|                      | microtubule-based process                   | 0.000596       | 160               |
|                      | synaptic vesicle cycle                      | 0.000681       | 41                |
|                      | dendrite development                        | 0.000733       | 63                |
|                      | cytoskeleton organization                   | 0.000784       | 271               |
| NM_UNTREATED         | None                                        |                |                   |
| NM_DMSO              | None                                        |                |                   |
| NM_APH               | regulation of cell projection organization  | 2.20E-06       | 108               |
|                      | regulation of cell morphogenesis            | 1.56E-05       | 94                |
|                      | cell projection organization                | 3.97E-05       | 201               |
|                      | regulation of neuron projection development | 0.000217       | 80                |
|                      | neuron projection development               | 0.000559       | 135               |
|                      | neuron development                          | 0.000559       | 154               |
|                      | nervous system development                  | 0.000646       | 305               |
|                      | cellular component morphogenesis            | 0.000646       | 186               |
| FX_DMSO_RLFS_overlap | flavonoid glucuronidation                   | 0.000136       | 8                 |
|                      | cellular glucuronidation                    | 0.000208       | 8                 |
|                      | uronic acid metabolic process               | 0.000499       | 8                 |
|                      | flavonoid metabolic process                 | 0.000499       | 8                 |
|                      | flavonoid biosynthetic process              | 0.000499       | 7                 |
|                      | glucuronate metabolic process               | 0.000499       | 8                 |
| FX_APH_RLFS_overlap  | single-organism membrane organization       | 0.001285       | 84                |

**Table S3. Related to figure 6A.** Correlation between DSBs in various groups and 169222 computationally predicted RLFSs (Wongsurawat et al., 2012) and 108011 composite DRIP-seq signals merged from all DRIP-seq data sets (NT2 and K562) (Sanz et al., 2016). Note the merged DRIP-seq dataset has 6.6 times the coverage of the RLFSs.

| <b>DSB group</b> | <b>Number of DSBs</b> | <b>Query (RLFS or DRIP-seq signals)</b> | <b>Number of DSBs overlapped with RLFS or DRIP-seq signals</b> | <b>P value Left</b> | <b>P value Right</b> | <b>P value Two-tail</b> | <b>Enrichment Ratio</b> |
|------------------|-----------------------|-----------------------------------------|----------------------------------------------------------------|---------------------|----------------------|-------------------------|-------------------------|
| FX.NT            | 4149                  | RLFS                                    | 133                                                            | 2.34E-43            | 1                    | 4.37E-43                | 0.358                   |
| FX.DMSO          | 9167                  | RLFS                                    | 1294                                                           | 1                   | 3.71E-37             | 6.24E-37                | 1.493                   |
| FX.APH           | 18473                 | RLFS                                    | 2323                                                           | 1                   | 1.25E-66             | 2.02E-66                | 1.498                   |
| NM.NT            | 2111                  | RLFS                                    | 129                                                            | 7.31E-13            | 1                    | 1.36E-12                | 0.552                   |
| NM.DMSO          | 3927                  | RLFS                                    | 659                                                            | 1                   | 1.22E-34             | 1.82E-34                | 1.746                   |
| NM.APH           | 7002                  | RLFS                                    | 554                                                            | 0.045261            | 0.95877              | 0.089567                | 0.927                   |
| FX.NT            | 4149                  | DRIP-seq                                | 526                                                            | 7.62E-14            | 1                    | 1.54E-13                | 0.717                   |
| FX.DMSO          | 9167                  | DRIP-seq                                | 2658                                                           | 1                   | 1.07E-155            | 1.55E-                  | 1.914                   |
| FX.APH           | 18473                 | DRIP-seq                                | 4137                                                           | 1                   | 1.36E-80             | 2.21E-80                | 1.422                   |
| NM.NT            | 2111                  | DRIP-seq                                | 389                                                            | 0.64755             | 0.37359              | 0.73422                 | 1.02                    |
| NM.DMSO          | 3927                  | DRIP-seq                                | 1229                                                           | 1                   | 2.21E-90             | 2.98E-90                | 2.083                   |
| NM.APH           | 7002                  | DRIP-seq                                | 1326                                                           | 1                   | 1.57E-06             | 2.93E-06                | 1.157                   |

P values were calculated using bedtools Fisher's Exact Test. "NT", untreated.

**Table S4. Related to figure 6A.** Statistical analysis of absolute distance between RLFs and DSBs in the indicated categories on each chromosome using GenometriCorr. Shown are the projection test p-values (P) and projection test observed to expected ratios (R). Samples with R values greater than 3.5 are shown in bold.

| Chr | FX.Untreated |      | FX.DMSO       |             | FX.APH        |             | NM.Untreated |      | NM.DMSO       |             | NM.APH |      |
|-----|--------------|------|---------------|-------------|---------------|-------------|--------------|------|---------------|-------------|--------|------|
|     | P            | R    | P             | R           | P             | R           | P            | R    | P             | R           | P      | R    |
| 1   | 0.355        | 1.04 | <b>2.22e-</b> | <b>3.79</b> | 1.07e-        | 2.76        | 0.224        | 1.23 | 0.086         | 1.51        | 0.353  | 0.81 |
| 2   | 0.314        | 0.64 | <b>2.21e-</b> | <b>3.62</b> | 1.55e-        | 2.62        | 0.236        | 1.21 | <b>1.73e-</b> | <b>3.79</b> | 0.010  | 1.85 |
| 3   | 0.446        | 0.69 | 1.29e-        | 3.02        | 1.81e-        | 2.57        | 0.329        | 0.00 | 0.024         | 2.28        | 0.131  | 1.43 |
| 4   | 0.283        | 0.39 | 2.39e-        | 3.00        | 1.44e-        | 3.22        | 0.355        | 0.80 | 0.036         | 2.20        | 0.199  | 1.28 |
| 5   | 0.217        | 0.34 | 1.09e-        | 3.24        | 1.63e-        | 2.79        | 0.244        | 0.00 | 0.007         | 2.55        | 0.148  | 1.38 |
| 6   | 0.090        | 0.00 | <b>6.36e-</b> | <b>3.74</b> | 5.08e-        | 2.06        | 0.336        | 0.00 | 0.134         | 1.53        | 0.028  | 0.00 |
| 7   | 0.489        | 0.86 | 6.30e-        | 2.51        | 4.01e-        | 2.57        | 0.108        | 0.00 | 0.104         | 1.48        | 0.126  | 1.33 |
| 8   | 0.150        | 0.29 | 4.34e-        | 2.96        | 1.06e-        | 2.08        | 0.182        | 1.36 | 0.203         | 1.29        | 0.131  | 0.40 |
| 9   | 0.301        | 0.41 | 3.91e-        | 3.21        | 4.19e-        | 3.19        | 0.174        | 1.39 | 0.016         | 2.17        | 0.109  | 0.46 |
| 10  | 0.137        | 0.28 | 2.85e-        | 3.27        | 3.85e-        | 2.80        | 0.302        | 1.04 | 0.088         | 1.63        | 0.373  | 1.01 |
| 11  | 0.070        | 0.23 | 7.45e-        | 2.21        | 0.001         | 1.64        | 0.118        | 0.00 | 0.047         | 1.70        | 0.123  | 0.52 |
| 12  | 0.044        | 0.00 | <b>4.91e-</b> | <b>4.04</b> | 7.32e-        | 2.74        | 0.209        | 0.00 | 0.076         | 1.70        | 0.350  | 1.04 |
| 13  | 0.372        | 0.00 | <b>9.55e-</b> | <b>6.96</b> | <b>8.71e-</b> | <b>5.43</b> | 0.347        | 0.00 | 0.482         | 0.00        | 0.260  | 0.00 |
| 14  | 0.190        | 1.33 | <b>8.41e-</b> | <b>3.51</b> | <b>6.05e-</b> | <b>3.81</b> | 0.035        | 2.78 | <b>5.87e-</b> | <b>4.21</b> | 0.103  | 1.62 |
| 15  | 0.109        | 1.65 | <b>3.62e-</b> | <b>4.23</b> | <b>2.64e-</b> | <b>3.92</b> | 0.377        | 0.00 | 0.054         | 1.96        | 0.088  | 1.63 |
| 16  | 0.050        | 0.21 | <b>0.00e-</b> | <b>5.66</b> | <b>0.00e-</b> | <b>4.52</b> | 0.484        | 0.76 | 0.060         | 1.62        | 0.291  | 1.11 |
| 17  | 0.056        | 0.22 | 2.62e-        | 3.28        | 7.21e-        | 3.15        | 0.322        | 0.43 | 0.353         | 1.04        | 0.165  | 1.27 |
| 18  | 0.103        | 1.78 | <b>1.14e-</b> | <b>3.96</b> | 3.54e-        | 2.76        | 0.144        | 1.49 | 0.061         | 2.23        | 0.237  | 1.19 |
| 19  | 0.057        | 0.45 | 2.32e-        | 1.94        | 2.88e-        | 1.91        | 0.162        | 0.44 | 0.429         | 0.99        | 0.065  | 0.63 |
| 20  | 0.456        | 0.80 | 5.62e-        | 2.83        | 9.08e-        | 3.16        | 0.135        | 1.56 | 0.039         | 2.14        | 0.218  | 1.23 |
| 21  | 0.230        | 0.00 | <b>5.01e-</b> | <b>7.10</b> | <b>2.22e-</b> | <b>6.00</b> | 0.426        | 0.00 | 0.014         | 2.81        | 0.432  | 0.89 |
| 22  | 0.093        | 0.00 | <b>1.80e-</b> | <b>5.34</b> | <b>3.99e-</b> | <b>3.76</b> | 0.462        | 0.64 | 0.016         | 2.14        | 0.009  | 2.15 |
| X   | 0.184        | 1.35 | 0.081         | 1.48        | 0.098         | 1.33        | 0.113        | 1.63 | 0.024         | 2.13        | 0.077  | 1.55 |
| ALL | 5.47e-       | 0.52 | 0             | 3.16        | 0             | 2.68        | 0.041        | 0.71 | 8.93e-        | 1.97        | 0.150  | 1.08 |

**Table S5. Related to figure 6A.** Number of genes containing DSBs in FX cells that overlap RLFs or DRIP-seq signals.

| <b>DSB Group</b>            | <b>Total DSBs</b> | <b>Genes containing DSBs*</b> | <b>Genes containing DSBs that overlap RLFs*</b> | <b>Genes containing DSBs that overlap DRIP-seq signals*</b> |
|-----------------------------|-------------------|-------------------------------|-------------------------------------------------|-------------------------------------------------------------|
| FXdms0.FXaph.overlap        | 6177 (28.8%)      | 4121 (27.8%)                  | 894 (33.1%)                                     | 2364 (37.8%)                                                |
| FXdms0.FXaph.uniquetoFXaph  | 12296 (57.3%)     | 8715 (58.8%)                  | 1427 (52.9%)                                    | 3113 (49.8%)                                                |
| FXdms0.FXaph.uniquetoFXdms0 | 2984 (13.9%)      | 1990 (13.4%)                  | 378 (14.0%)                                     | 778 (12.4%)                                                 |
| FXdms0.FXaph.total          | 21457 (100%)      | 14826 (100%)                  | 2699 (100%)                                     | 6255 (100%)                                                 |
| NMdms0.NMaph.overlap        | 3209 (41.6%)      | 2484 (41.4%)                  | 523 (50.7%)                                     | 1240 (41.3%)                                                |
| NMdms0.NMaph.uniquetoNMaph  | 3792 (49.2%)      | 2524 (42.1%)                  | 153 (14.8%)                                     | 718 (23.9%)                                                 |
| NMdms0.NMaph.uniquetoNMdms0 | 714 ( 9.3%)       | 990 (16.5%)                   | 356 (34.5%)                                     | 1042 (34.7%)                                                |
| NMdms0.NMaph.total          | 7715 (100%)       | 5998 (100%)                   | 1032 (100%)                                     | 3000 (100%)                                                 |

\* Percentages in parentheses indicate the percentage of DSBs or genes in each of the three categories (e.g., XX.XX.overlap, XX.XX.uniquetoXXaph, and XX.XX.uniquetoXXdms0) over the sum of the three categories

**Table S6. Related to Key resources table for oligonucleotides.** Oligonucleotides used in this study is listed below.

| Name                                                           | Source     |
|----------------------------------------------------------------|------------|
| 5'-CGAGGTTAACATGGTGAGCAAGGGCGAGGAG-3' (pcDNA3_RMEGFP_JL_FWD2)  | This paper |
| 5'-ATTCGTTAACCTTGTACAGCTCGTCCATGCC -3' (pcDNA3_RMEGFP_JL_REV2) | This paper |
| 5'-TAACGAATTCATGGACTACAAGGACGACGAT-3' (pFRT_RMFMRP_JL_FWD2)    | This paper |
| 5'-GGTAGAATTCTTAGGGTACTCCATTACAGAG-3' (pFRT_RMFMRP_JL_REV2)    | This paper |
| 5'-TCagatctTCAGGCTGCACATTCTTTTC-3' (control-1_F)               | This paper |
| 5'-CTCggatccTGCTTTCACTGCAGTTCC-3' (control-1_R)                | This paper |
| 5'-CTCagatctTGATAATTACAAGGTACACGTTATTGC-3' (control-2_F)       | This paper |
| 5'-CTCggatccTTGGTTAGGATAATAAGCACTATGG-3' (control-2_R)         | This paper |
| 5'-CTCagatctGTAGACGCCTCACCTTCTGC-3' (RLFS-1_F)                 | This paper |
| 5'- CTCggatccTGCGGGTGTAACACTGAAA-3' (RLFS-1_R)                 | This paper |
| 5'- CTCagatctCATAACTAAGCACTGTATGCC-3' (RLFS-2_F)               | This paper |
| 5'- CTCggatccCCTAGGGACAAGGGGAGGTA-3' (RLFS-2_R)                | This paper |
| 5'-CTGTGTACATGAGCAAAGACAAAGATATC-3' (SHE2-Y-F)                 | This paper |
| 5'-CTGGAATTCTCAGTTTTTCAATTTACC -3' (SHE2-Y-R)                  | This paper |
| 5'-CTGGAATCCCCTAATTATGGCAAGGCAAG-3' (RNH1-Y-F)                 | This paper |
| 5'-CTGGCGGCCGCACAGCATTATCGTCTAGATG-3' (RNH1-Y-R)               | This paper |
